# Supplementary material for: Cloning of the African indigenous cattle breed Kenyan Boran
Source: PubMed Central journal article supplement (PMC5074306; doi:10.1111/age.12441), 2016-04-25
Supplement: AGE-47-510-s002.pdf [file AGE-47-510-s002.pdf]

**Table S2 Summary of somatic cell nuclear transfer with Boran embryonic fibroblasts**

| <b>No. of Oocytes</b> | <b>No. of Reconstructed Embryos</b> | <b>No. of Blastocysts</b> | <b>No. of Transferred Blastocysts</b> | <b>No. of Surrogate</b> | <b>No. of Pregnancy</b> | <b>Abortion</b>       | <b>No. of Born Calves</b> | <b>No. of Survived Calves</b> |
|-----------------------|-------------------------------------|---------------------------|---------------------------------------|-------------------------|-------------------------|-----------------------|---------------------------|-------------------------------|
| 1244                  | 723 (58.1% <sup>a</sup> )           | 85 (6.8% <sup>a</sup> )   | 22                                    | 16                      | 5                       | 3 (60% <sup>b</sup> ) | 2 (40% <sup>b</sup> )     | 1 (20% <sup>b</sup> )         |

<sup>a</sup>: the percentage is calculated against the total number of oocytes.

<sup>b</sup>: the percentage is calculated against the number of pregnancy.
